# Supplementary material for: Human gelatin tissue-adhesive hydrogels prepared by enzyme-mediated biosynthesis of DOPA and Fe3+ion crosslinking
Source: Royal Society of Chemistry journal article supplement (doi:10.1039/c3tb20696c), 2013-10-31
Supplement: c3tb20696c.pdf [file c3tb20696c.pdf]

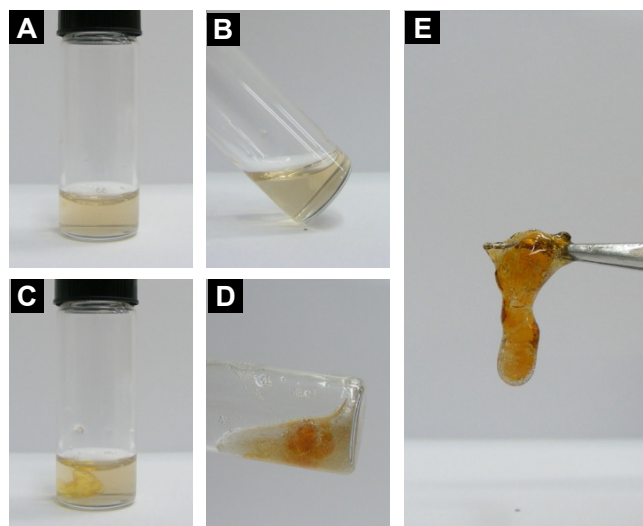

**Supplementary Figure 1.** Macroscopic images of DOPA-gelatin (A, B) and DOPA-Fe<sup>3+</sup> gelatin hydrogels (C, D, E). The addition of 10 mM FeCl<sub>3</sub> solution induced a rapid hydrogel formation of DOPA-gelatin within seconds (C, D). (E) A DOPA-Fe<sup>3+</sup> gelatin hydrogel formed after gentle agitation for 1 h.

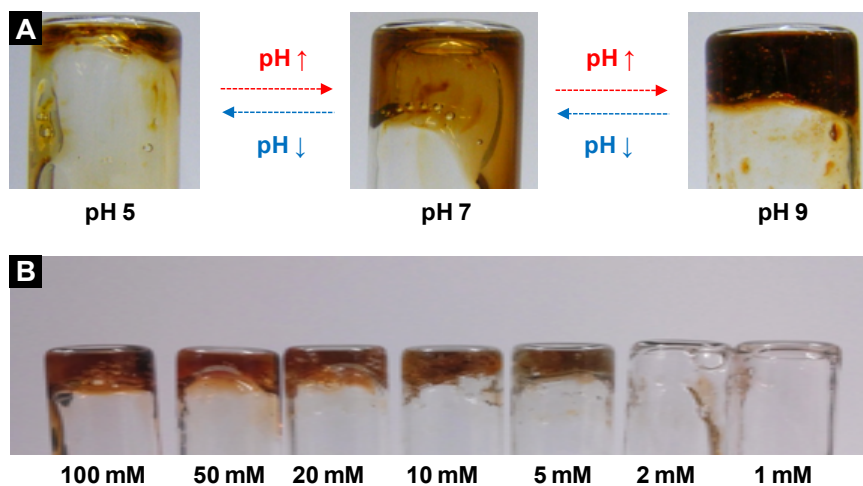

**Supplementary Figure 2.** Macroscopic appearance of DOPA-Fe<sup>3+</sup> gelatin hydrogels formed at different pHs (A) and different Fe<sup>3+</sup>:DOPA molar ratios (B). Vials containing samples were turned upside down for 30 min. Mechanical strengths of hydrogels were enhanced when pH increased (A) and DOPA:Fe<sup>3+</sup> ion ratio increased (B). When 10 mM of Fe<sup>3+</sup> ion was applied, the DOPA-Fe<sup>3+</sup> gelatin hydrogel had a rigid gel state (B).
